# Supplementary material for: TRAIN (Transcription of Repeats Activates INterferon) in response to chromatin destabilization induced by small molecules in mammalian cells
Source: eLife journal article supplement (doi:10.7554/elife.30842), 2018-02-05
Supplement: supp [file elife-30842-supp-v1.zip]

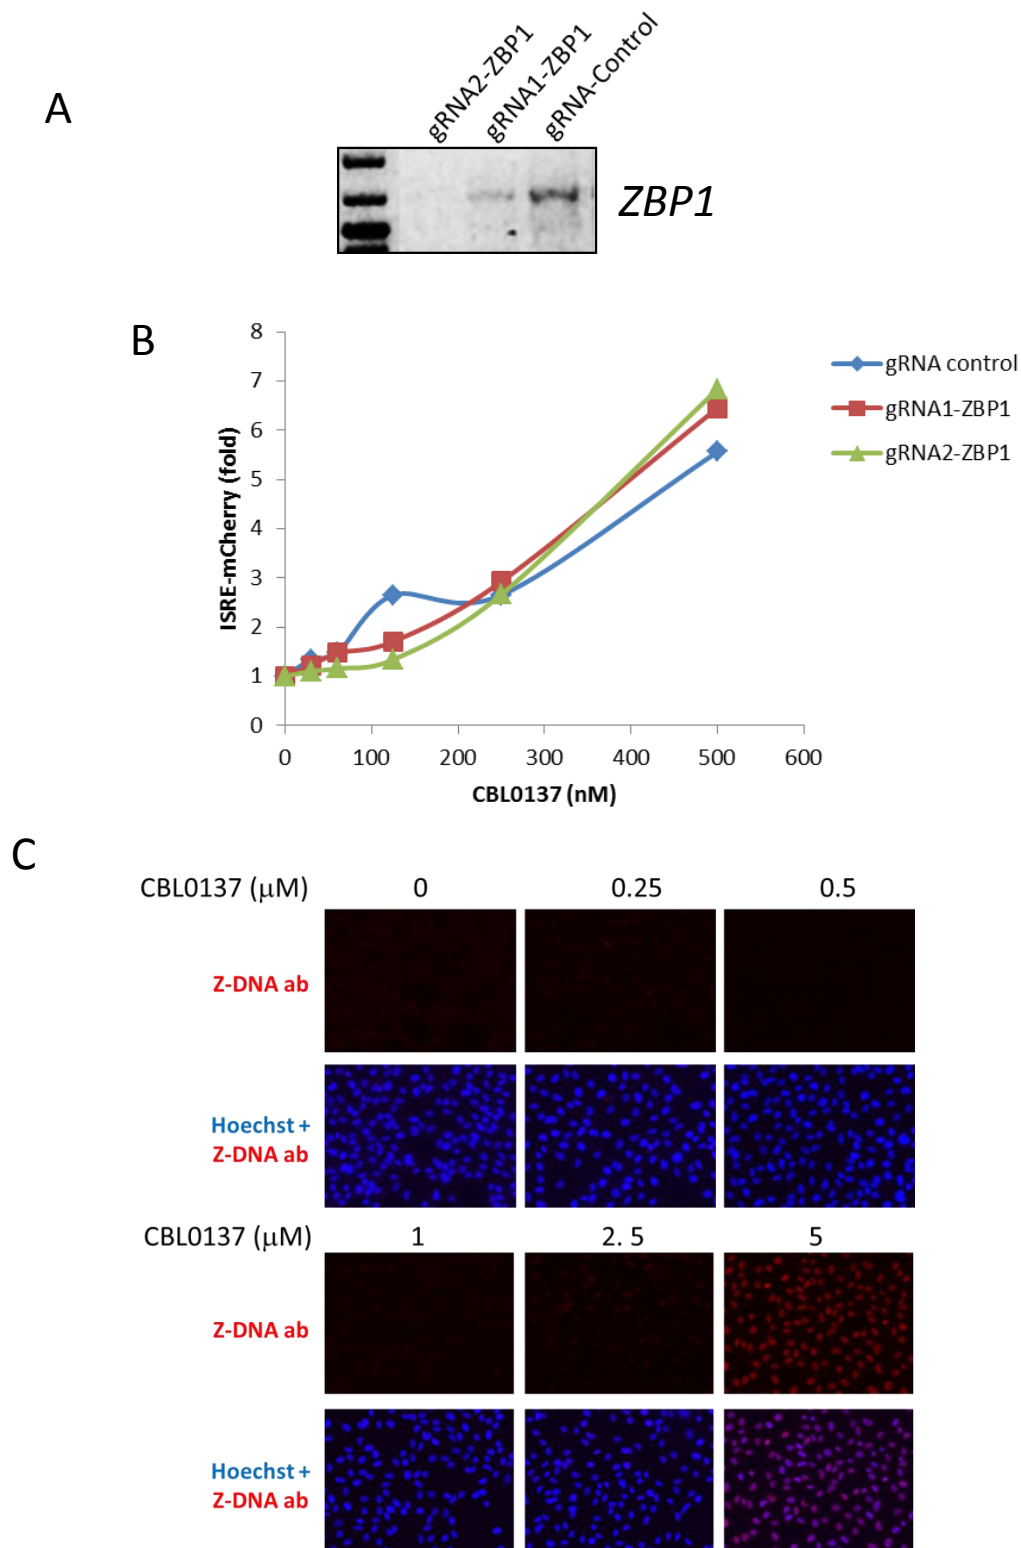

Figure 6 - Figure Supplement 1. IFN induction by CBL0137 does not depend on ZBP1. A. RT-PCR with primers to *ZBP1* of mRNA from HeLa cells in which *ZBP1* gene was inactivated with CRISP-Cas9 recombinase. Two different gRNA to *ZBP1* and one control were used. B. Fluorescent intensity of ISRE-mCherry reporter in HeLa cells control or with inactivated ZBP1 treated with CBL0137 for 48 hours. C. Immunofluorescent staining of HeLa cells treated with CBL0137 for 1 hour with antibody to Z-DNA (ref) or Hoechst (blue).
