# Supplementary material for: TRAIN (Transcription of Repeats Activates INterferon) in response to chromatin destabilization induced by small molecules in mammalian cells
Source: eLife journal article supplement (doi:10.7554/elife.30842), 2018-02-05
Supplement: supp [file elife-30842-supp-v1.zip]

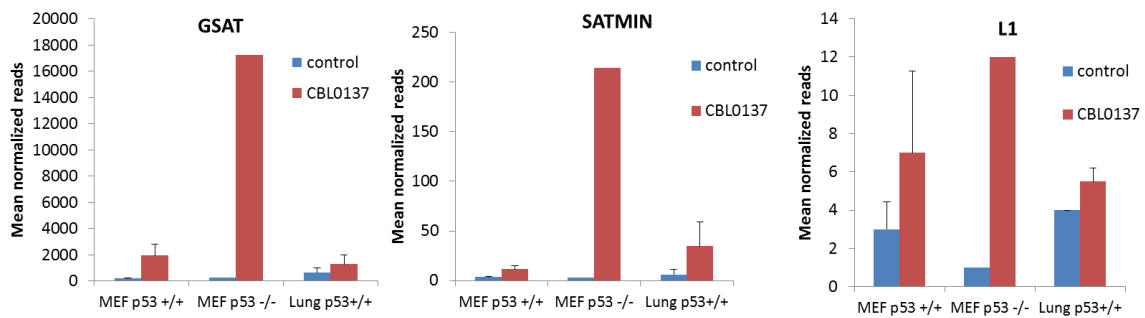

Figure 7 - Figure Supplement 1. Abundance of transcripts corresponding to major (GSAT) or minor (SATMIN) satellites or LINE1 per millions of reads of RNA-seq of total RNA from MEF cells from *Trp53* wild type (p53+/+) or *Trp53-null* (p53-/-) mice or lung tissue of *Trp53* wild type mice treated with either 1  $\mu$ M or 60 mg/kg of CBL0137 for 24 hours.
