# Supplementary material for: TRAIN (Transcription of Repeats Activates INterferon) in response to chromatin destabilization induced by small molecules in mammalian cells
Source: eLife journal article supplement (doi:10.7554/elife.30842), 2018-02-05
Supplement: supp [file elife-30842-supp-v1.zip]

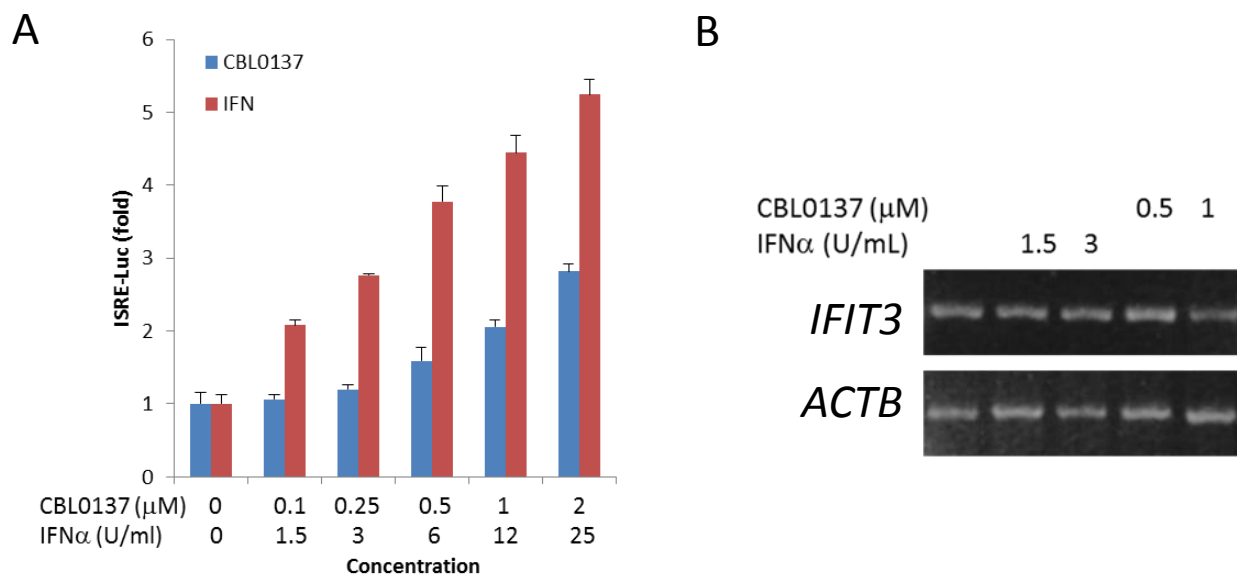

Figure 4 - Figure Supplement 1. Comparison of the sensitivity of ISRE reporter assay with detection of the transcript of endogenous ISG, *IFIT3* in human tumor cell line HCT116 transduced with lentiviral ISRE-Luc reporter. Cells were treated for 36 hours with indicated doses of IFN $\alpha$  or CBL0137 and then either used for reporter assay (A) or for RNA isolation and RT-PCR (B).
