# Supplementary material for: TRAIN (Transcription of Repeats Activates INterferon) in response to chromatin destabilization induced by small molecules in mammalian cells
Source: eLife journal article supplement (doi:10.7554/elife.30842), 2018-02-05
Supplement: supp [file elife-30842-supp-v1.zip]

**A****Gene sets enriched for genes upregulated by CBL0137 in liver**

| Gene Set Name                                | # Genes in Gene Set (K) | # Genes in Overlap (k) | k/K    | p-value  | FDR q-value |
|----------------------------------------------|-------------------------|------------------------|--------|----------|-------------|
| REACTOME_IMMUNE_SYSTEM                       | 933                     | 26                     | 0.0279 | 3.06E-17 | 4.06E-14    |
| REACTOME_INTERFERON_SIGNALING                | 159                     | 13                     | 0.0818 | 5.27E-15 | 3.51E-12    |
| REACTOME_INTERFERON_ALPHA_BETA_SIGNALING     | 64                      | 10                     | 0.1562 | 1.00E-14 | 4.44E-12    |
| REACTOME_CYTOKINE_SIGNALING_IN_IMMUNE_SYSTEM | 270                     | 14                     | 0.0519 | 2.51E-13 | 8.36E-11    |

**B****Gene sets enriched for genes upregulated by CBL0137 in lung**

| Gene Set Name                            | # Genes in Gene Set (K) | # Genes in Overlap (k) | k/K    | p-value  | FDR q-value |
|------------------------------------------|-------------------------|------------------------|--------|----------|-------------|
| KEGG_SYSTEMIC_LUPUS_ERYTHEMATOSUS        | 140                     | 18                     | 0.1286 | 6.62E-21 | 8.80E-18    |
| REACTOME_INTERFERON_ALPHA_BETA_SIGNALING | 64                      | 13                     | 0.2031 | 3.57E-18 | 1.52E-15    |
| REACTOME_IMMUNE_SYSTEM                   | 933                     | 31                     | 0.0332 | 1.34E-17 | 3.57E-15    |
| REACTOME_INTERFERON_SIGNALING            | 159                     | 15                     | 0.0943 | 1.44E-15 | 2.04E-13    |

**C****Gene sets enriched for genes upregulated by CBL0137 in spleen**

| Gene Set Name                            | # Genes in Gene Set (K) | # Genes in Overlap (k) | k/K    | p-value  | FDR q-value |
|------------------------------------------|-------------------------|------------------------|--------|----------|-------------|
| REACTOME_IMMUNE_SYSTEM                   | 933                     | 62                     | 0.0665 | 1.49E-39 | 1.98E-36    |
| NABA_MATRISOME                           | 1028                    | 60                     | 0.0584 | 4.10E-35 | 2.73E-32    |
| REACTOME_INTERFERON_SIGNALING            | 159                     | 27                     | 0.1698 | 1.54E-28 | 5.11E-26    |
| REACTOME_INTERFERON_ALPHA_BETA_SIGNALING | 64                      | 19                     | 0.2969 | 1.68E-25 | 4.46E-23    |
| REACTOME_INTERFERON_GAMMA_SIGNALING      | 63                      | 14                     | 0.2222 | 3.72E-17 | 7.06E-15    |
| KEGG_LYSOSOME                            | 121                     | 17                     | 0.1405 | 5.61E-17 | 9.32E-15    |
| REACTOME_INNATE_IMMUNE_SYSTEM            | 279                     | 22                     | 0.0789 | 3.94E-16 | 5.81E-14    |

Figure 2 - Figure Supplement 1. GSEA analysis of genes upregulated in liver (A), lung (B) and spleen (C) of mice treated with CBL0137.
