# Supplementary material for: TRAIN (Transcription of Repeats Activates INterferon) in response to chromatin destabilization induced by small molecules in mammalian cells
Source: eLife journal article supplement (doi:10.7554/elife.30842), 2018-02-05
Supplement: supp [file elife-30842-supp-v1.zip]

A

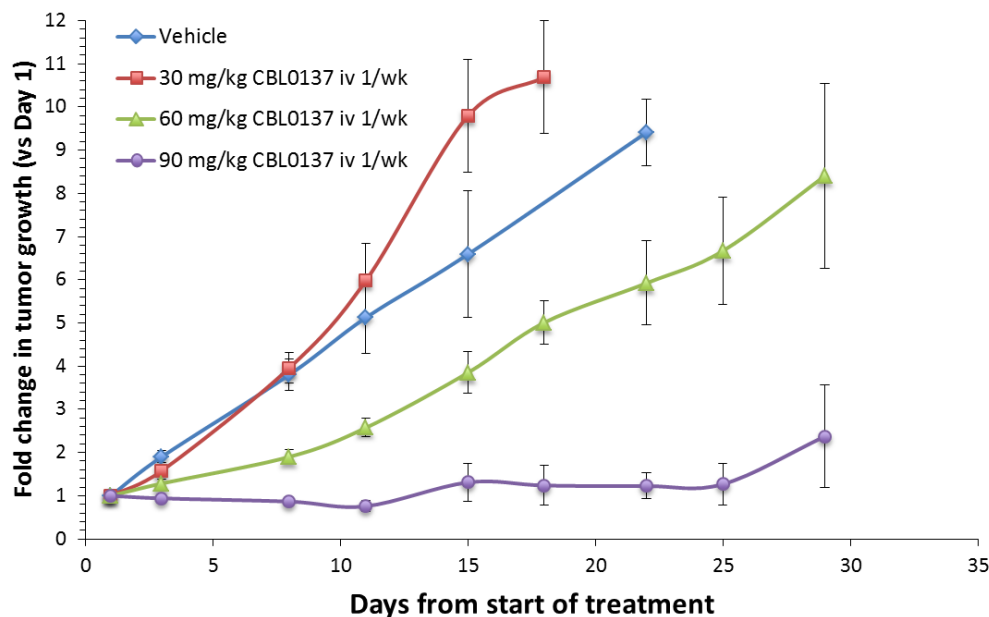

B

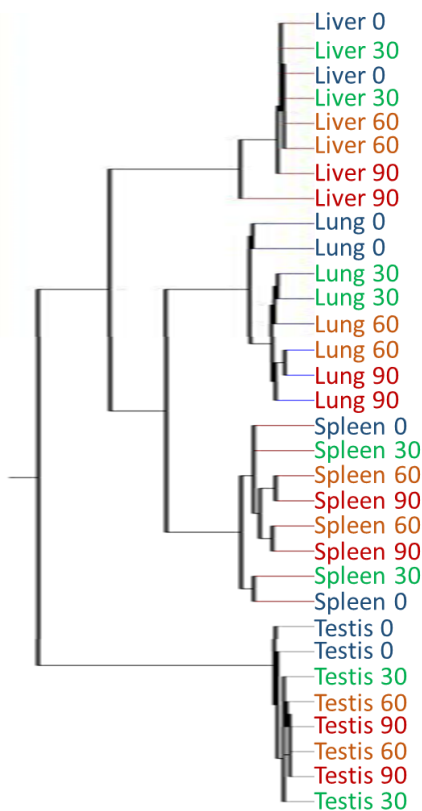

C

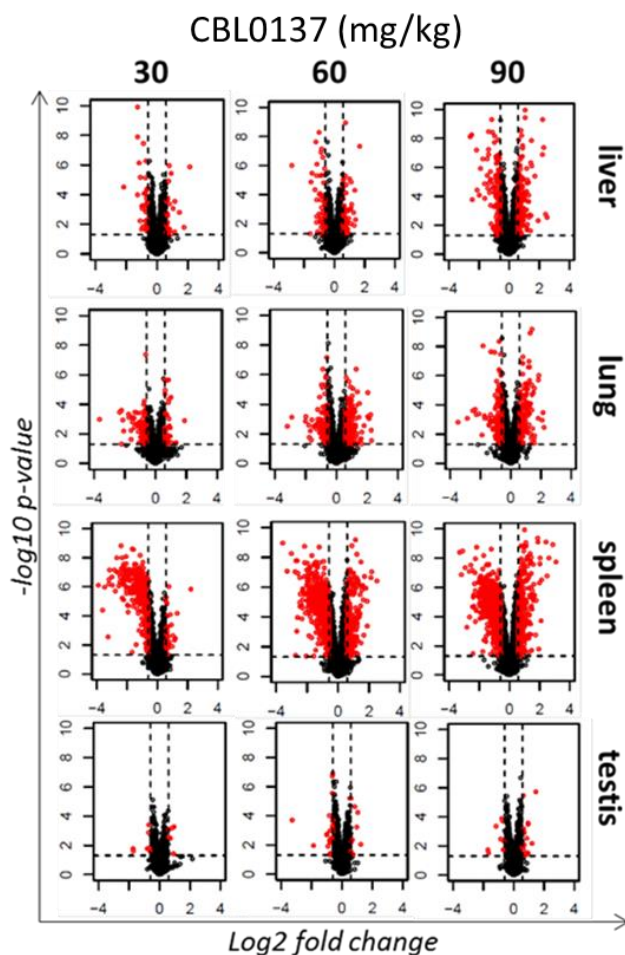

Figure 1 - Figure Supplement 1. Effects of different doses of CBL0137 in tumor growth and gene expression in mice. A. Change in a volume of subcutaneous HepG2 tumors in SCID mice treated once a week with IV with vehicle (5% dextrose) or 30, 60 and 90 mg/kg of CBL0137 for 4 weeks. B. Dendrogram of gene expression in different organs of mice treated with different doses of CBL0137 IV or control vehicle 24 hours before organ collection obtained using unsupervised hierarchical clustering. C. Volcano plots of changes in gene expression in different organs of mice treated as in B.
