# Supplementary figures and images for: TRAIN (Transcription of Repeats Activates INterferon) in response to chromatin destabilization induced by small molecules in mammalian cells
Source: eLife journal article supplement (doi:10.7554/elife.30842), 2018-02-05

A

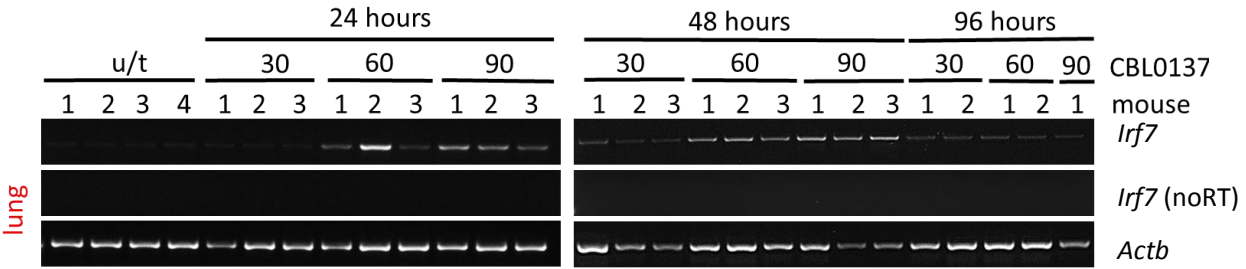

B

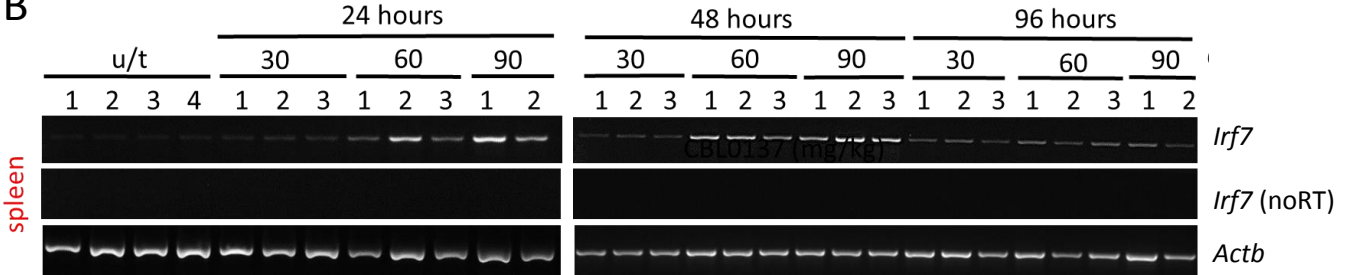

C

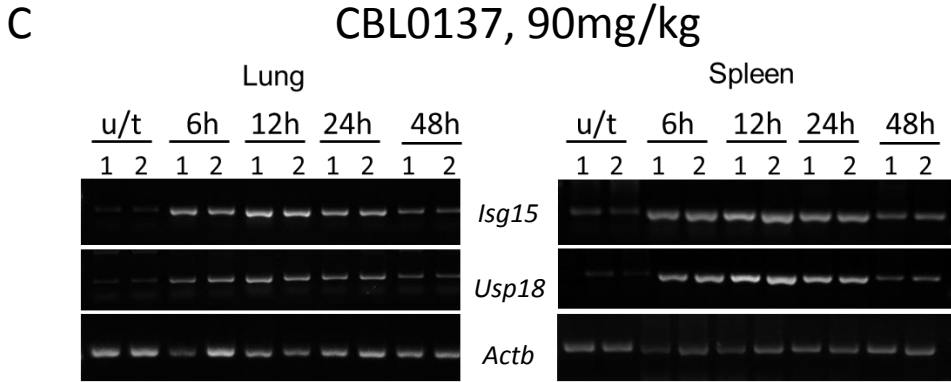

Figure 3 - Figure Supplement 2. Images of RT-PCR reactions used for quantitation for figure 3.

Supplement: supp [file elife-30842-supp-v1.zip]

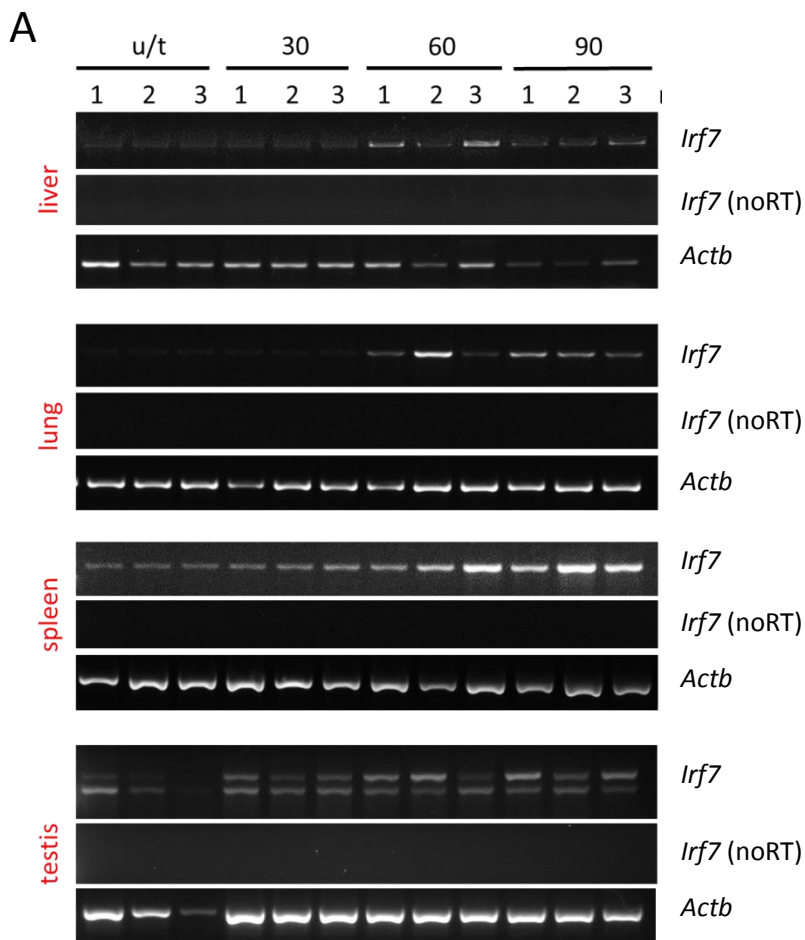

**B**

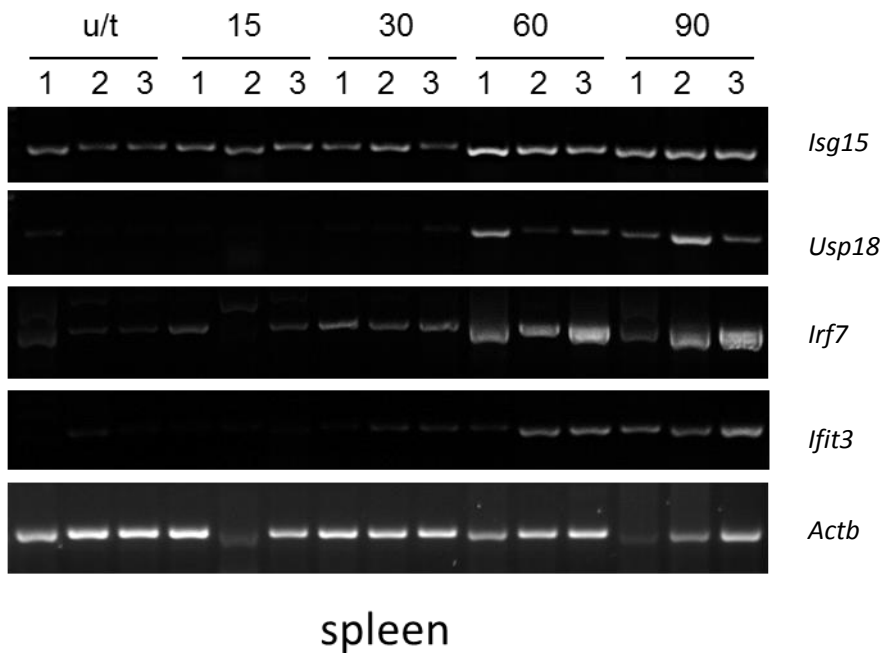

Figure 3 - Figure Supplement 1. Images of RT-PCR reactions used for quantitation on figure 3.

Supplement: supp [file elife-30842-supp-v1.zip]
